# Supplementary figures and images for: Chronic Exposure to Chewing Tobacco Induces Metabolic Reprogramming and Cancer Stem Cell-Like Properties in Esophageal Epithelial Cells
Source: MDPI journal article supplement (doi:10.3390/cells8090949), 2019-08-21

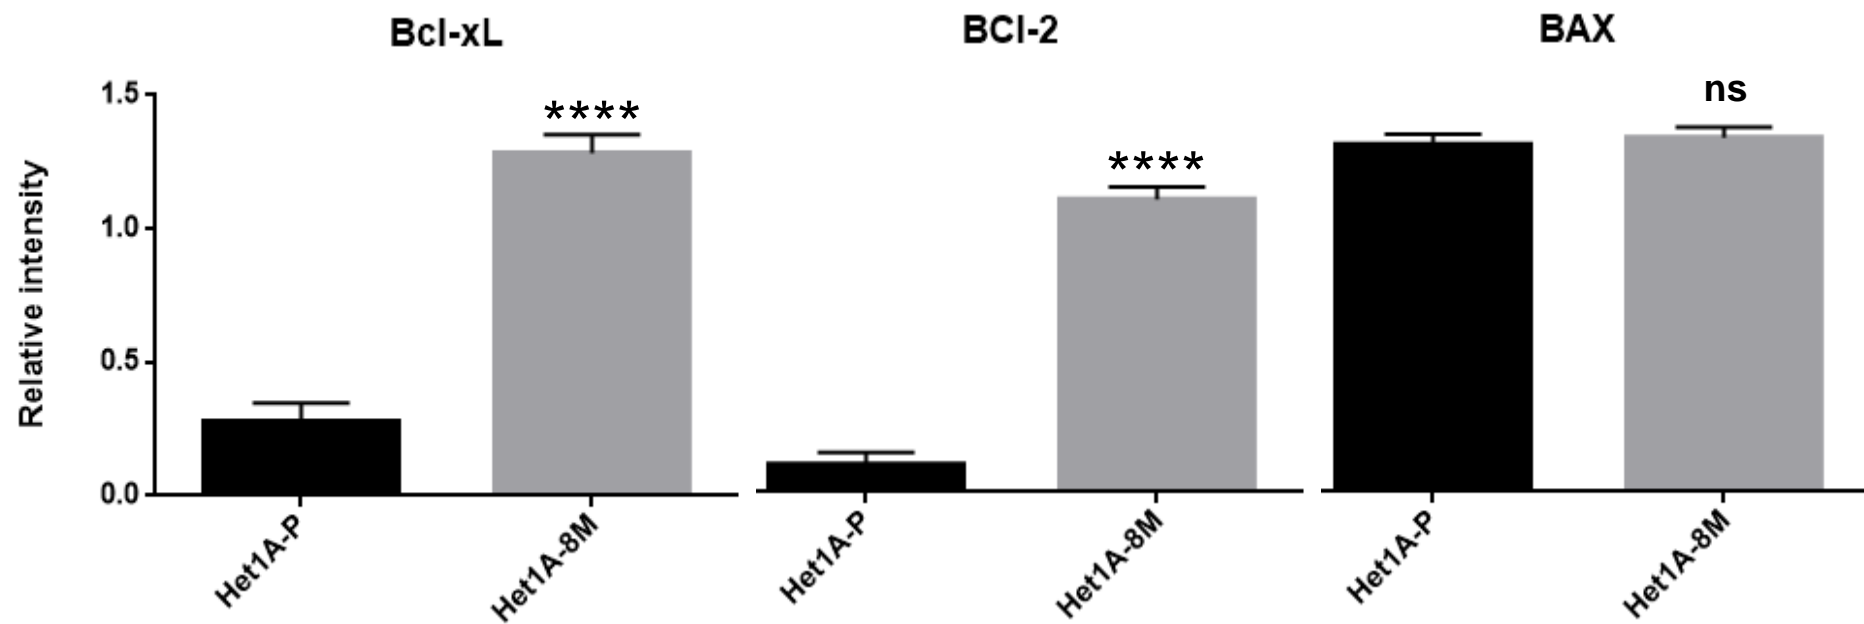

Supplement: s1 [file s1]

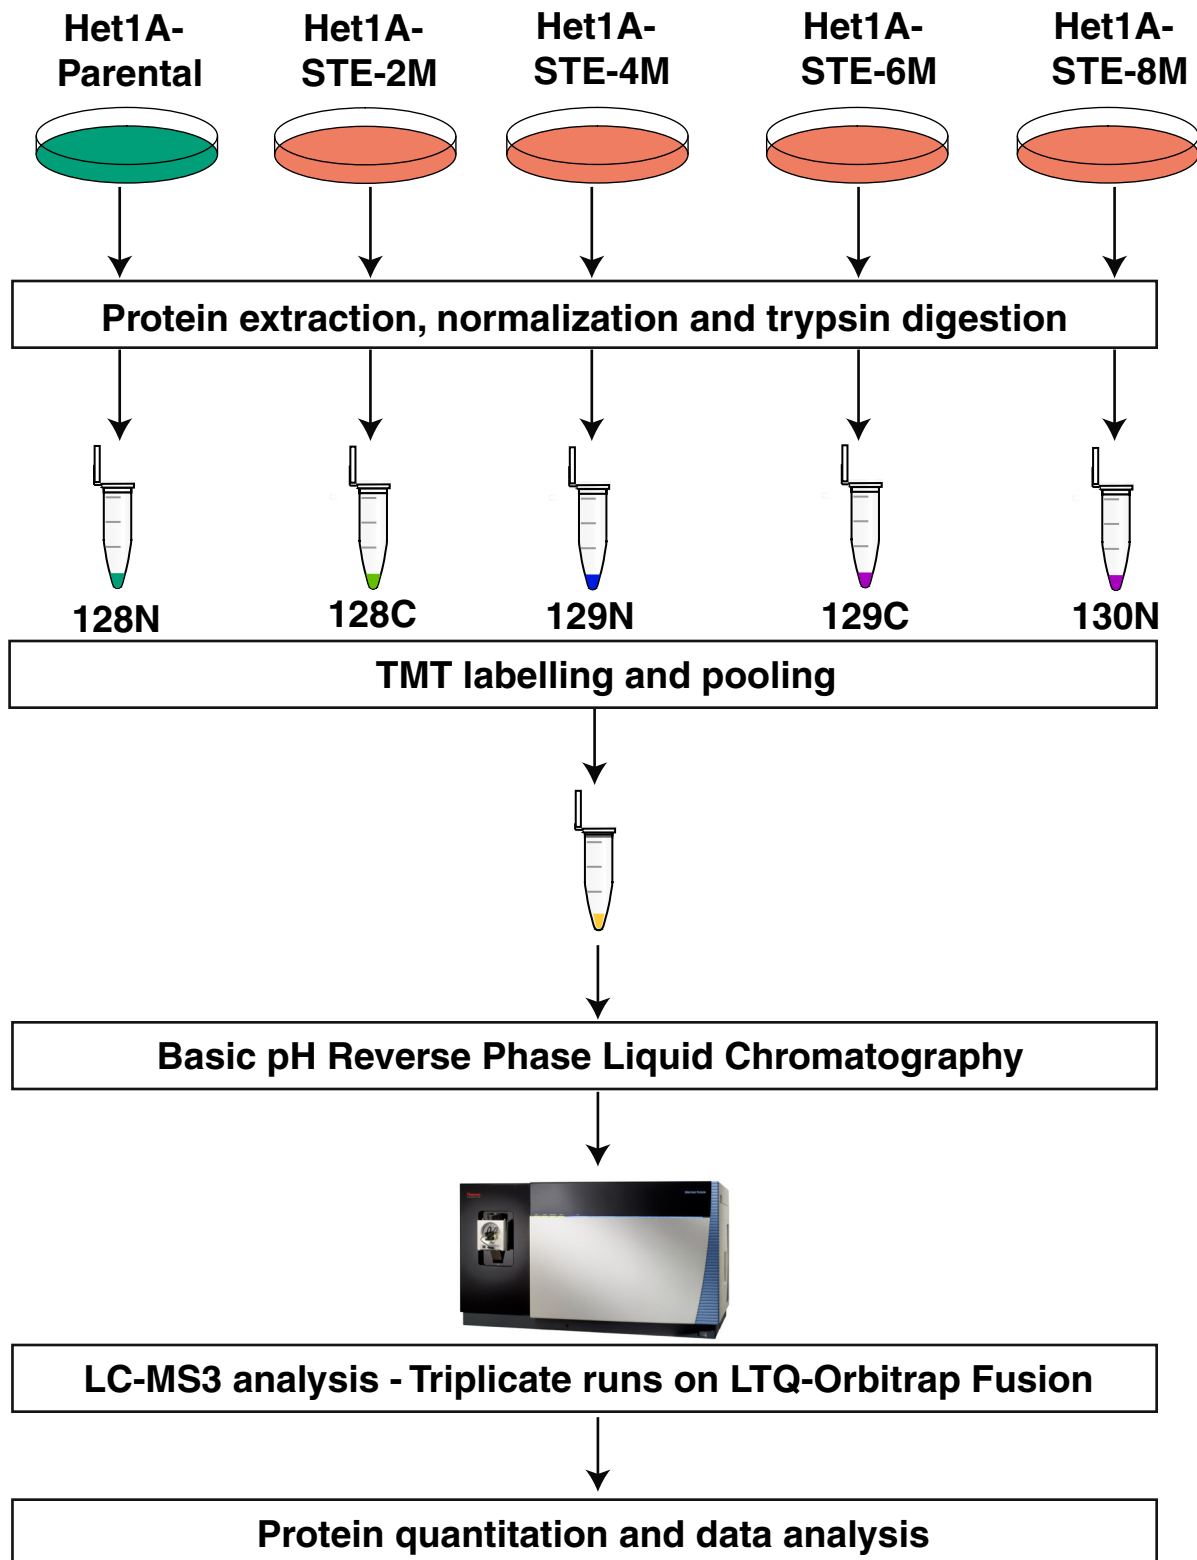

Supplement: s1 [file s1]
